# Supplementary material
Source: Research Square preprint supplement (doi:10.21203/rs.3.rs-8934544/v1)
Supplement: Supplementary file 1 [file 283dc7be693a2014794645ff.docx]

## Additional Information

Supplementary Table S1. Acceptability, practicability, effectiveness, affordability, side-effects and equity criteria (APEASE criteria) to select the BCTs.

Supplementary Table S2. Selection (rating) of behavioural change techniques from the behaviour change techniques taxonomy using APEASE criteria

Supplementary TIDieR checklist S3. TIDieR used for reporting mode of delivery of our food safety intervention

Supplementary Table S4. List of hygiene materials provided to the butcher shops during our food safety intervention

Supplementary inspection checklist S5. Inspection checklist used to inspect butcher shops during our food safety intervention
