# Supplementary material
Source: Research Square preprint supplement (doi:10.21203/rs.3.rs-8934544/v1)
Supplement: Supplementary file 2 [file 5e78b892ce4b1b7828925e16.xlsx]

## Sheet: BCTs
No.	BCT grouping	BCT	Definition	Example	Acceptability(Low (L)-medium (M)-high (H)-unsure (U)-NA):How far can the intervention be judged appropriate by the key stakeholders including shop managers, meat handlers, food regulators, consumers, research team delivering the intervention and any relevant community and commercial groups?	Practicability(Low (L)-medium (M)-high (H)-unsure (U)-NA):How far can the intervention be implemented at scale within the intended context of butcher shops, project period, available human, financial and logistic resources?	Effectiveness(Low (L)-medium (M)-high (H)-unsure (U)-NA): How effective can the intervention be in enhancing meat handlers’ food safety knowledge and behaviours and leading to reduced microbial contamination in shops or influencing the entire food safety ecosystem of butcher shops? How far will it reach the intended target butcher shops and how large an effect will it have on those shops which ar…	Affordability(Low (L)-medium (M)-high (H)-unsure (U)-NA):How far can the intervention be afforded when delivered at the scale intended within the project budget capacity?	Side-effects(Low (L)-medium (M)-high (H)-unsure (U)-NA): How far can intervention lead to unintended adverse outcomes?	Equity(Low (L)-medium (M)-high (H)-unsure (U)-NA): How far will the intervention increase or decrease differences between shops compared to the normal situation before the intervention?	selected (Y forYes/N for No)
1	Goals and planning
1		Goal setting (behavior)	Set or agree on a goal defined in terms of the behavior to be achieved Note: only code goal-setting if there is sufficient evidence that goal set as part of intervention; if goal unspecified or a behavioral outcome, code 1.3, Goal setting (outcome); if the goal defines a specific context, frequency, duration or intensity for the behavior, also code 1.4, Action plannin	Agree on a daily walking goal (e.g. 3 miles) with the person and reach agreement about the goal. Set the goal of eating 5 pieces of fruit per day as specified in public health guidelines	U	L	L	NA	U	L	N
2		Problem solving	Analyse , or prompt the person to analyse, factors influencing the behavior and generate or select strategies that include overcoming barriers and/or increasing facilitators (includes ‘Relapse Prevention’ and ‘Coping Planning’) Note: barrier identification without solutions is not sufficient. If the BCT does not include analysing the behavioral problem, consider 12.3, Avoidance/changing exposure …	Identify specific triggers (e.g. being in a pub, feeling anxious) that generate the urge/want/need to drink and develop strategies for avoiding environmental triggers or for managing negative emotions, such as anxiety, that motivate drinking. Prompt the patient to identify barriers preventing them from starting a new exercise regime e.g., lack of motivation, and discuss ways in which they could h…	L	L	L	NA	U	NA	N
3		Goal setting (outcome)	Set or agree on a goal defined in terms of a positive outcome of wanted behavior Note: only code guidelines if set as a goal in an intervention context; if goal is a behavior, code 1.1, Goal setting (behavior); if goal unspecified code 1.3, Goal setting (outcome	Set a weight loss goal (e.g. 0.5 kilogram over one week) as an outcome of changed eating patterns	L	L	L	NA	U	NA	N
4		Action planning	Prompt detailed planning of performance of the behavior (must include at least one of context, frequency, duration and intensity). Context may be environmental (physical or social) or internal (physical, emotional or cognitive) (includes ‘Implementation Intentions’) Note: evidence of action planning does not necessarily imply goal setting, only code latter if sufficient evidence	Encourage a plan to carry condoms when going out socially at weekends Prompt planning the performance of a particular physical activity (e.g. running) at a particular time (e.g. before work) on certain days of the week	L	L	L	NA	U	NA	N
5		Review behavior goal(s)	Review behavior goal(s) jointly with the person and consider modifying goal(s) or behavior change strategy in light of achievement. This may lead to re-setting the same goal, a small change in that goal or setting a new goal instead of (or in addition to) the first, or no change Note: if goal specified in terms of behavior, code 1.5, Review behavior goal(s), if goal unspecified, code 1.7, Review …	Examine how well a person’s performance corresponds to agreed goals e.g. whether they consumed less than one unit of alcohol per day, and consider modifying future behavioral goals accordingly e.g. by increasing or decreasing alcohol target or changing type of alcohol consumed	U	L	L	NA	U	L	N
6		Discrepancy between current behavior and goal	Draw attention to discrepancies between a person’s current behavior (in terms of the form, frequency, duration, or intensity of that behavior) and the person’s previously set outcome goals, behavioral goals or action plans (goes beyond self_x0002_monitoring of behavior) Note: if discomfort is created only code 13.3, Incompatible beliefs and not 1.6, Discrepancy between current behavior and goal; …	Point out that the recorded exercise fell short of the goal set	L	L	L	NA	U	L	N
8		Review outcome goal(s)	Review outcome goal(s) jointly with the person and consider modifying goal(s) in light of achievement. This may lead to re_x0002_setting the same goal, a small change in that goal or setting a new goal instead of, or in addition to the first Note: if goal specified in terms of behavior, code 1.5, Review behavior goal(s), if goal unspecified, code 1.7, Review outcome goal(s); if discrepancy create…	Examine how much weight has been lost and consider modifying outcome goal(s) accordingly e.g., by increasing or decreasing subsequent weight loss targets	L	L	M	NA	U	NA	N
9		Behavioral contract	Create a written specification of the behavior to be performed, agreed on by the person, and witnessed by another Note: also code 1.1, Goal setting (behavior)	Sign a contract with the person e.g. specifying that they will not drink alcohol for one week	H	L	L	NA	U	NA	N
10		commitment	Ask the person to affirm or reaffirm statements indicating commitment to change the behavior Note: if defined in terms of the behavior to be achieved also code 1.1, Goal setting (behavior)	Ask the person to use an “I will” statement to affirm or reaffirm a strong commitment (i.e. using the words “strongly”, “committed” or “high priority”) to start, continue or restart the attempt to take medication as prescribed	H	H	H	NA	L	L	Y
2	Feedback and monitoring
1		Monitoring of behavior by others without feedback	Observe or record behavior with the person’s knowledge as part of a behavior change strategy Note: if monitoring is part of a data collection procedure rather than a strategy aimed at changing behavior, do not code; if feedback given, code only 2.2, Feedback on behavior, and not 2.1, Monitoring of behavior by others without feedback; if monitoring outcome(s) code 2.5, Monitoring outcome(s) of beh…	Watch hand washing behaviors among health care staff and make notes on context, frequency and technique used	L	L	L	NA	U	L	N
2		Feedback on behavior	Monitor and provide informative or evaluative feedback on performance of the behavior (e.g. form, frequency, duration, intensity) Note: if Biofeedback, code only 2.6, Biofeedback and not 2.2, Feedback on behavior; if feedback is on outcome(s) of behavior, code 2.7, Feedback on outcome(s) of behavior; if there is no clear evidence that feedback was given, code 2.1, Monitoring of behavior by others…	Inform the person of how many steps they walked each day (as recorded on a pedometer) or how many calories they ate each day (based on a food consumption questionnaire).	H	H	H	NA	L	L	Y
3		Self-monitoring of behavior	Establish a method for the person to monitor and record their behavior(s) as part of a behavior change strategy Note: if monitoring is part of a data collection procedure rather than a strategy aimed at changing behavior, do not code; if monitoring of outcome of behavior, code 2.4, Self-monitoring of outcome(s) of behavior; if monitoring is by someone else (without feedback), code 2.1, Monitoring…	Ask the person to record daily, in a diary, whether they have brushed their teeth for at least two minutes before going to bed Give patient a pedometer and a form for recording daily total number of steps	L	L	L	NA	U	L	N
4		Self-monitoring of outcome(s) of behavior	Establish a method for the person to monitor and record the outcome(s) of their behavior as part of a behavior change strategy Note: if monitoring is part of a data collection procedure rather than a strategy aimed at changing behavior, do not code ; if monitoring behavior, code 2.3, Self-monitoring of behavior; if monitoring is by someone else (without feedback), code 2.5, Monitoring outcome(s) …	Ask the person to weigh themselves at the end of each day, over a two week period, and record their daily weight on a graph to increase exercise behaviors	L	L	L	NA	U	L	N
5		Monitoring outcome(s) of behavior by others without feedback	Observe or record outcomes of behavior with the person’s knowledge as part of a behavior change strategy Note: if monitoring is part of a data collection procedure rather than a strategy aimed at changing behavior, do not code; if feedback given, code only 2.7, Feedback on outcome(s) of behavior; if monitoring behavior code 2.1, Monitoring of behavior by others without feedback; if self-monitorin…	Record blood pressure, blood glucose, weight loss, or physical fitness	L	L	L	H	M	L	N
6		Biofeedback	Provide feedback about the body (e.g. physiological or biochemical state) using an external monitoring device as part of a behavior change strategy Note: if Biofeedback, code only 2.6, Biofeedback and not 2.2, Feedback on behavior or 2.7, Feedback on outcome(s) of behaviour	Inform the person of their blood pressure reading to improve adoption of health behaviors	NA	NA	NA	NA	NA	NA	N
7		Feedback on outcome(s) of behavior	Monitor and provide feedback on the outcome of performance of the behavior Note: if Biofeedback, code only 2.6, Biofeedback and not 2.7, Feedback on outcome(s) of behavior; if feedback is on behavior code 2.2, Feedback on behavior; if there is no clear evidence that feedback was given code 2.5, Monitoring outcome(s) of behavior by others without feedback; if feedback on behaviour is evaluative e.…	Inform the person of how much weight they have lost following the implementation of a new exercise regime	H	H	H	M	L	L	Y
3	Social support
	1	Social support (unspecified)	Advise on, arrange or provide social support (e.g. from friends, relatives, colleagues,’ buddies’ or staff) or non_x0002_contingent praise or reward for performance of the behavior. It includes encouragement and counselling, but only when it is directed at the behavior Note: attending a group class and/or mention of ‘follow-up’ does not necessarily apply this BCT, support must be explicitly menti…	Advise the person to call a ‘buddy’ when they experience an urge to smoke Arrange for a housemate to encourage continuation with the behavior change programme Give information about a self_x0002_help group that offers support for the behaviour	L	L	L	NA	L	L	N
	2	Social support (practical)	Advise on, arrange, or provide practical help (e.g. from friends, relatives, colleagues, ‘buddies’ or staff) for performance of the behavior Note: if emotional, code 3.3, Social support (emotional); if general or unspecified, code 3.1, Social support (unspecified) If only restructuring the physical environment or adding objects to the environment, code 12.1, Restructuring the physical environment…	Ask the partner of the patient to put their tablet on the breakfast tray so that the patient remembers to take it	L	L	L	NA	U	L	N
		Social support (emotional)	Advise on, arrange, or provide emotional social support (e.g. from friends, relatives, colleagues, ‘buddies’ or staff) for performance of the behavior Note: if practical, code 3.2, Social support (practical); if unspecified, code 3.1, Social support (unspecified)	Ask the patient to take a partner or friend with them to their colonoscopy appointment	L	L	L	NA	U	L	N
4	Shaping knowledge
	1	Instruction on how to perform a behavior	Advise or agree on how to perform the behavior (includes ‘Skills training’) Note: when the person attends classes such as exercise or cookery, code 4.1, Instruction on how to perform the behavior, 8.1, Behavioral practice/rehearsal and 6.1, Demonstration of the behavior	Advise the person how to put a condom on a model of a penis correctly	H	H	H	NA	L	L	Y
	2	Information about antecedents	Provide information about antecedents (e.g. social and environmental situations and events, emotions, cognitions) that reliably predict performance of the behaviour	Advise to keep a record of snacking and of situations or events occurring prior to snacking	L	L	L	NA	U	L	N
	3	Re-attribution	Elicit perceived causes of behavior and suggest alternative explanations (e.g. external or internal and stable or unstable)	If the person attributes their over-eating to the frequent presence of delicious food, suggest that the ‘real’ cause may be the person’s inattention to bodily signals of hunger and satiety	U	L	L	NA	U	L	N
	4	Behavioral experiments	Advise on how to identify and test hypotheses about the behavior, its causes and consequences, by collecting and interpreting data	Ask a family physician to give evidence-based advice rather than prescribe antibiotics and to note whether the patients are grateful or annoyed	NA	L	L	H	U	L	N
5	Natural consequences
	1	Information about health consequences	Provide information (e.g. written, verbal, visual) about health consequences of performing the behavior Note: consequences can be for any target, not just the recipient(s) of the intervention; emphasising importance of consequences is not sufficient; if information about emotional consequences, code 5.6, Information about emotional consequences; if about social, environmental or unspecified conse…	Explain that not finishing a course of antibiotics can increase susceptibility to future infection Present the likelihood of contracting a sexually transmitted infection following unprotected sexual behavior	H	H	H	M	L	L	Y
	2	Salience of consequences	Use methods specifically designed to emphasise the consequences of performing the behaviour with the aim of making them more memorable (goes beyond informing about consequences) Note: if information about consequences, also code 5.1, Information about health consequences, 5.6, Information about emotional consequences or 5.3, Information about social and environmental consequences	Produce cigarette packets showing pictures of health consequences e.g. diseased lungs, to highlight the dangers of continuing to smoke	L	L	L	M	M	L	N
	3	Information about social and environmental consequences	Provide information (e.g. written, verbal, visual) about social and environmental consequences of performing the behavior Note: consequences can be for any target, not just the recipient(s) of the intervention; if information about health or consequences, code 5.1, Information about health consequences; if about emotional consequences, code 5.6, Information about emotional consequences; if unspec…	Tell family physician about financial remuneration for conducting health screening Inform a smoker that the majority of people disapprove of smoking in public places	H	H	H	M	L	L	Y
	4	Monitoring of emotional consequences	Prompt assessment of feelings after attempts at performing the behavior	Agree that the person will record how they feel after taking their daily walk	L	L	L	NA	L	L	N
	5	Anticipated regret	Induce or raise awareness of expectations of future regret about performance of the unwanted behavior Note: not including 5.6, Information about emotional consequences; if suggests adoption of a perspective or new perspective in order to change cognitions also code 13.2, Framing/reframing	Ask the person to assess the degree of regret they will feel if they do not quit smoking	L	L	L	NA	M	L	N
	6	Information about emotional consequences	Provide information (e.g. written, verbal, visual) about emotional consequences of performing the behavior Note: consequences can be related to emotional health disorders (e.g. depression, anxiety) and/or states of mind (e.g. low mood, stress); not including 5.5, Anticipated regret; consequences can be for any target, not just the recipient(s) of the intervention; if information about health cons…	Explain that quitting smoking increases happiness and life satisfaction	M	L	L	NA	L	L	N
6	Comparison of behaviour
	1	Demonstration of the behavior	Provide an observable sample of the performance of the behaviour, directly in person or indirectly e.g. via film, pictures, for the person to aspire to or imitate (includes ‘Modelling’). Note: if advised to practice, also code, 8.1, Behavioural practice and rehearsal; If provided with instructions on how to perform, also code 4.1, Instruction on how to perform the behaviour	Demonstrate to nurses how to raise the issue of excessive drinking with patients via a role_x0002_play exercise	H	H	H	M	L	L	Y
	2	Social comparison	Draw attention to others’ performance to allow comparison with the person’s own performance Note: being in a group setting does not necessarily mean that social comparison is actually taking place	Show the doctor the proportion of patients who were prescribed antibiotics for a common cold by other doctors and compare with their own data	L	L	L	NA	M	L	N
	3	Information about others’ approval	Provide information about what other people think about the behavior. The information clarifies whether others will like, approve or disapprove of what the person is doing or will do	Tell the staff at the hospital ward that staff at all other wards approve of washing their hands according to the guidelines	H	H	H	NA	L	L	Y
7	Associations
	1	Prompts/cues	Introduce or define environmental or social stimulus with the purpose of prompting or cueing the behavior. The prompt or cue would normally occur at the time or place of performance Note: when a stimulus is linked to a specific action in an if-then plan including one or more of frequency, duration or intensity also code 1.4, Action planning	Put a sticker on the bathroom mirror to remind people to brush their teeth	H	H	H	M	L	L	Y
	2	Cue signalling reward	Identify an environmental stimulus that reliably predicts that reward will follow the behavior (includes ‘Discriminative cue’)	Advise that a fee will be paid to dentists for a particular dental treatment of 6-8 year old, but not older, children to encourage delivery of that treatment (the 6- 8 year old children are the environmental stimulus)	L	L	L	U	M	L	N
	3	Reduce prompts/cues	Withdraw gradually prompts to perform the behavior (includes ‘Fading’)	Reduce gradually the number of reminders used to take medication	L	L	L	U	U	L	N
	4	Remove access to the reward	Advise or arrange for the person to be separated from situations in which unwanted behavior can be rewarded in order to reduce the behavior (includes ‘Time out’)	Arrange for cupboard containing high calorie snacks to be locked for a specified period to reduce the consumption of sugary foods in between meals	L	L	L	U	U	U	N
	5	Remove aversive stimulus	Advise or arrange for the removal of an aversive stimulus to facilitate behavior change (includes ‘Escape learning’)	Arrange for a gym-buddy to stop nagging the person to do more exercise in order to increase the desired exercise behaviour	L	L	L	L	M	U	N
	6	Satiation	Advise or arrange repeated exposure to a stimulus that reduces or extinguishes a drive for the unwanted behavior	Arrange for the person to eat large quantities of chocolate, in order to reduce the person’s appetite for sweet foods	NA	NA	NA	NA	NA	NA	N
	7	Exposure	Provide systematic confrontation with a feared stimulus to reduce the response to a later encounter	Agree a schedule by which the person who is frightened of surgery will visit the hospital where they are scheduled to have surgery	NA	NA	NA	NA	NA	NA	N
	8	Associative learning	Present a neutral stimulus jointly with a stimulus that already elicits the behavior repeatedly until the neutral stimulus elicits that behavior (includes ‘Classical/Pavlovian Conditioning’) Note: when a BCT involves reward or punishment, code one or more of: 10.2, Material reward (behavior); 10.3, Non_x0002_specific reward; 10.4, Social reward, 10.9, Self-reward; 10.10, Reward (outcome)	Present repeatedly fatty foods with a disliked sauce to discourage the consumption of fatty foods	NA	NA	NA	NA	NA	NA	N
8	Repetition and substitution
	1	Behavioral practice/ rehearsal	Prompt practice or rehearsal of the performance of the behavior one or more times in a context or at a time when the performance may not be necessary, in order to increase habit and skill Note: if aiming to associate performance with the context, also code 8.3, Habit formation	Prompt asthma patients to practice measuring their peak flow in the nurse’s consulting room	H	H	H	M	L	L	Y
	2	Behavior substitution	Prompt substitution of the unwanted behavior with a wanted or neutral behavior Note: if this occurs regularly, also code 8.4, Habit reversa	Suggest that the person goes for a walk rather than watches television	NA	NA	NA	NA	NA	NA	N
	3	Habit formation	Prompt rehearsal and repetition of the behavior in the same context repeatedly so that the context elicits the behavior Note: also code 8.1, Behavioral practice/rehearsal	Prompt patients to take their statin tablet before brushing their teeth every evening	H	H	H	M	L	L	Y
	4	Habit reversal	Prompt rehearsal and repetition of an alternative behavior to replace an unwanted habitual behavior Note: also code 8.2, Behavior substitution	Ask the person to walk up stairs at work where they previously always took the lift	NA	NA	NA	NA	NA	NA	N
	5	Generalisation of a target behavior	Advise to perform the wanted behaviour, which is already performed in a particular situation, in another situation	Advise to repeat toning exercises learned in the gym when at home	H	H	M	NA	L	L	Y
	6	Graded tasks	Set easy-to-perform tasks, making them increasingly difficult, but achievable, until behavior is performed	Ask the person to walk for 100 yards a day for the first week, then half a mile a day after they have successfully achieved 100 yards, then two miles a day after they have successfully achieved one mile	L	L	L	M	M	L	N
9	Comparison of outcomes
	1	Credible source	Present verbal or visual communication from a credible source in favour of or against the behavior Note: code this BCT if source generally agreed on as credible e.g., health professionals, celebrities or words used to indicate expertise or leader in field and if the communication has the aim of persuading; if information about health consequences, also code 5.1, Information about health consequen…	Present a speech given by a high status professional to emphasise the importance of not exposing patients to unnecessary radiation by ordering x-rays for back pain	H	H	H	M	L	L	Y
	3	Pros and cons	Advise the person to identify and compare reasons for wanting (pros) and not wanting to (cons) change the behavior (includes ‘Decisional balance’) Note: if providing information about health consequences, also code 5.1, Information about health consequences; if providing information about emotional consequences, also code 5.6, Information about emotional consequences; if providing information abo…	Advise the person to list and compare the advantages and disadvantages of prescribing antibiotics for upper respiratory tract infections	H	H	M	NA	L	L	Y
	3	Comparative imagining of future outcomes	Prompt or advise the imagining and comparing of future outcomes of changed versus unchanged behaviour	Prompt the person to imagine and compare likely or possible outcomes following attending versus not attending a screening appointment	H	H	H	NA	L	L	Y
10	Reward and threat
	1	Material incentive (behavior)	Inform that money, vouchers or other valued objects will be delivered if and only if there has been effort and/or progress in performing the behavior (includes ‘Positive reinforcement’) Note: if incentive is social, code 10.5, Social incentive if unspecified code 10.6, Non-specific incentive, and not 10.1, Material incentive (behavior); if incentive is for outcome, code 10.8, Incentive (outcome).…	Inform that a financial payment will be made each month in pregnancy that the woman has not smoked	L	L	M	L	M	L	N
	2	Material reward (behavior)	Arrange for the delivery of money, vouchers or other valued objects if and only if there has been effort and/or progress in performing the behavior (includes ‘Positive reinforcement’) Note: If reward is social, code 10.4, Social reward, if unspecified code 10.3, Non_x0002_specific reward, and not 10.1, Material reward (behavior); if reward is for outcome, code 10.10, Reward (outcome). If informed…	Arrange for the person to receive money that would have been spent on cigarettes if and only if the smoker has not smoked for one month	L	L	M	L	M	L	N
	3	Non-specific reward	Arrange delivery of a reward if and only if there has been effort and/or progress in performing the behavior (includes ‘Positive reinforcement’) Note: if reward is material, code 10.2, Material reward (behavior), if social, code 10.4, Social reward, and not 10.3, Non_x0002_specific reward; if reward is for outcome code 10.10, Reward (outcome). If informed of reward in advance of rewarded behaviou…	Identify something (e.g. an activity such as a visit to the cinema) that the person values and arrange for this to be delivered if and only if they attend for health screening	L	L	L	L	M	L	N
	4	Social reward	Arrange verbal or non-verbal reward if and only if there has been effort and/or progress in performing the behavior (includes ‘Positive reinforcement’) Note: if reward is material, code 10.2, Material reward (behavior), if unspecified code 10.3, Non-specific reward, and not 10.4, Social reward; if reward is for outcome code 10.10, Reward (outcome). If informed of reward in advance of rewarded beh…	Congratulate the person for each day they eat a reduced fat diet	H	L	M	L	L	L	N
	5	Social incentive	Inform that a verbal or non-verbal reward will be delivered if and only if there has been effort and/or progress in performing the behavior (includes ‘Positive reinforcement’) Note: if incentive is material, code 10.1, Material incentive (behavior), if unspecified code 10.6, Non-specific incentive, and not 10.5, Social incentive; if incentive is for outcome code 10.8, Incentive (outcome). If rewa…	Inform that they will be congratulated for each day they eat a reduced fat diet	H	L	M	L	L	L	N
	6	Non-specific incentive	Inform that a reward will be delivered if and only if there has been effort and/or progress in performing the behavior (includes ‘Positive reinforcement’) Note: if incentive is material, code 10.1, Material incentive (behavior), if social, code 10.5, Social incentive and not 10.6, Non-specific incentive; if incentive is for outcome code 10.8, Incentive (outcome). If reward is delivered also code …	Identify an activity that the person values and inform them that this will happen if and only if they attend for health screening	L	L	L	L	L	L	N
	7	Self-incentive	Plan to reward self in future if and only if there has been effort and/or progress in performing the behavior Note: if self-reward is material, also code 10.1, Material incentive (behavior), if social, also code 10.5, Social incentive, if unspecified, also code 10.6, Non-specific incentive; if incentive is for outcome code 10.8, Incentive (outcome). If reward is delivered also code one of: 10.2, …	Encourage to provide self with material (e.g., new clothes) or other valued objects if and only if they have adhered to a healthy diet	NA	NA	NA	NA	NA	NA	N
	8	Incentive (outcome)	Inform that a reward will be delivered if and only if there has been effort and/or progress in achieving the behavioural outcome (includes ‘Positive reinforcement’) Note: this includes social, material, self_x0002_and non-specific incentives for outcome; if incentive is for the behavior code 10.5, Social incentive, 10.1, Material incentive (behavior), 10.6, Non-specific incentive or 10.7, Self-in…	Inform the person that they will receive money if and only if a certain amount of weight is lost	H	H	H	M	L	L	Y
	9	Self-reward	Prompt self-praise or self-reward if and only if there has been effort and/or progress in performing the behavior Note: if self-reward is material, also code 10.2, Material reward (behavior), if social, also code 10.4, Social reward, if unspecified, also code 10.3, Non-specific reward; if reward is for outcome code 10.10, Reward (outcome). If informed of reward in advance of rewarded behaviour, a…	Encourage to reward self with material (e.g., new clothes) or other valued objects if and only if they have adhered to a healthy diet	NA	NA	NA	NA	NA	NA	N
	10	Reward (outcome)	Arrange for the delivery of a reward if and only if there has been effort and/or progress in achieving the behavioral outcome (includes ‘Positive reinforcement’) Note: this includes social, material, self_x0002_and non-specific rewards for outcome; if reward is for the behavior code 10.4, Social reward, 10.2, Material reward (behavior), 10.3, Non-specific reward or 10.9, Self-reward and not 10.10…	Arrange for the person to receive money if and only if a certain amount of weight is lost	H	L	L	L	L	L	N
	11	Future punishment	Inform that future punishment or removal of reward will be a consequence of performance of an unwanted behavior (may include fear arousal) (includes ‘Threat’)	Inform that continuing to consume 30 units of alcohol per day is likely to result in loss of employment if the person continues	NA	NA	NA	NA	NA	NA	N
11	Regulation
	1	Pharmacological support	Provide, or encourage the use of or adherence to, drugs to facilitate behavior change Note: if pharmacological support to reduce negative emotions (i.e. anxiety) then also code 11.2, Reduce negative emotions	Suggest the patient asks the family physician for nicotine replacement therapy to facilitate smoking cessation	NA	NA	NA	NA	NA	NA	N
	2	Reduce negative emotions	Advise on ways of reducing negative emotions to facilitate performance of the behavior (includes ‘Stress Management’) Note: if includes analysing the behavioural problem, also code 1.2, Problem solving	Advise on the use of stress management skills, e.g. to reduce anxiety about joining Alcoholics Anonymous	NA	NA	NA	NA	NA	NA	N
	3	Conserving mental resources	Advise on ways of minimising demands on mental resources to facilitate behavior change	Advise to carry food calorie content information to reduce the burden on memory in making food choices	NA	NA	NA	NA	NA	NA	N
	4	Paradoxical instructions	Advise to engage in some form of the unwanted behavior with the aim of reducing motivation to engage in that behaviour	Advise a smoker to smoke twice as many cigarettes a day as they usually do Tell the person to stay awake as long as possible in order to reduce insomnia	NA	NA	NA	NA	NA	NA	N
12	Antecedents
	1	Restructuring the physical environment	Change, or advise to change the physical environment in order to facilitate performance of the wanted behavior or create barriers to the unwanted behavior (other than prompts/cues, rewards and punishments) Note: this may also involve 12.3, Avoidance/reducing exposure to cues for the behavior; if restructuring of the social environment code 12.2, Restructuring the social environment; if only addin…	Advise to keep biscuits and snacks in a cupboard that is inconvenient to get to Arrange to move vending machine out of the schoo	M	M	H	H	L	L	Y
	2	Restructuring the social environment	Change, or advise to change the social environment in order to facilitate performance of the wanted behavior or create barriers to the unwanted behavior (other than prompts/cues, rewards and punishments) Note: this may also involve 12.3, Avoidance/reducing exposure to cues for the behavior; if also restructuring of the physical environment also code 12.1, Restructuring the physical environment	Advise to minimise time spent with friends who drink heavily to reduce alcohol consumption	NA	NA	NA	NA	NA	NA	N
	3	Avoidance/reducing exposure to cues for the behavior	Advise on how to avoid exposure to specific social and contextual/physical cues for the behavior, including changing daily or weekly routines Note: this may also involve 12.1, Restructuring the physical environment and/or 12.2, Restructuring the social environment; if the BCT includes analysing the behavioral problem, only code 1.2, Problem solving	Suggest to a person who wants to quit smoking that their social life focus on activities other than pubs and bars which have been associated with smoking	NA	NA	NA	NA	NA	NA	N
	4	Distraction	Advise or arrange to use an alternative focus for attention to avoid triggers for unwanted behaviour	Suggest to a person who is trying to avoid between-meal snacking to focus on a topic they enjoy (e.g. holiday plans) instead of focusing on food	NA	NA	NA	NA	NA	NA	N
	5	Adding objects to the environment	Add objects to the environment in order to facilitate performance of the behavior Note: Provision of information (e.g. written, verbal, visual) in a booklet or leaflet is insufficient. If this is accompanied by social support, also code 3.2, Social support (practical); if the environment is changed beyond the addition of objects, also code 12.1, Restructuring the physical environment	Provide free condoms to facilitate safe sex Provide attractive toothbrush to improve tooth brushing technique	H	H	H	M	L	L	Y
	6	Body changes	Alter body structure, functioning or support directly to facilitate behavior change	Prompt strength training, relaxation training or provide assistive aids (e.g. a hearing aid)	NA	NA	NA	NA	NA	NA	N
13	Identity
	1	Identification of self as role model	Inform that one's own behavior may be an example to others	Inform the person that if they eat healthily, that may be a good example for their children	L	L	L	NA	L	L	N
	2	Framing/reframing	Suggest the deliberate adoption of a perspective or new perspective on behavior (e.g. its purpose) in order to change cognitions or emotions about performing the behavior (includes ‘Cognitive structuring’); If information about consequences then code 5.1, Information about health consequences, 5.6, Information about emotional consequences or 5.3, Information about social and environmental consequ…	Suggest that the person might think of the tasks as reducing sedentary behavior (rather than increasing activity)	L	L	L	NA	L	L	N
	3	Incompatible beliefs	Draw attention to discrepancies between current or past behavior and self-image, in order to create discomfort (includes ‘Cognitive dissonance’)	Draw attention to a doctor’s liberal use of blood transfusion and their self-identification as a proponent of evidence-based medical practice	NA	NA	NA	NA	NA	NA	N
	4	Valued self-identity	Advise the person to write or complete rating scales about a cherished value or personal strength as a means of affirming the person’s identity as part of a behavior change strategy (includes ‘Self_x0002_affirmation’)	Advise the person to write about their personal strengths before they receive a message advocating the behavior change	L	L	L	NA	L	L	N
	5	Identity associated with changed behavior	Advise the person to construct a new self_x0002_identity as someone who ‘used to engage with the unwanted behavior’	Ask the person to articulate their new identity as an ‘ex-smoker’	L	L	L	NA	L	L	N
14	Scheduled consequences
	1	Behavior cost	Arrange for withdrawal of something valued if and only if an unwanted behavior is performed (includes ‘Response cost’). Note if withdrawal of contingent reward code, 14.3, Remove reward	Subtract money from a prepaid refundable deposit when a cigarette is smoked	NA	NA	NA	NA	NA	NA	N
	2	Punishment	Arrange for aversive consequence contingent on the performance of the unwanted behavior	Arrange for the person to wear unattractive clothes following consumption of fatty foods	NA	NA	NA	NA	NA	NA	N
	3	Remove reward	Arrange for discontinuation of contingent reward following performance of the unwanted behavior (includes ‘Extinction’)	Arrange for the other people in the household to ignore the person every time they eat chocolate (rather than attending to them by criticising or persuading)	NA	NA	NA	NA	NA	NA	N
	4	Reward approximation	Arrange for reward following any approximation to the target behavior, gradually rewarding only performance closer to the wanted behavior (includes ‘Shaping’) Note: also code one of 59-63	Arrange reward for any reduction in daily calories, gradually requiring the daily calorie count to become closer to the planned calorie intake	L	L	L	M	U	L	N
	5	Rewarding completion	Build up behavior by arranging reward following final component of the behavior; gradually add the components of the behavior that occur earlier in the behavioral sequence (includes ‘Backward chaining’) Note: also code one of 10.2, Material reward (behavior); 10.3, Non-specific reward; 10.4, Social reward, 10.9, Self_x0002_reward; 10.10, Reward (outcome)	Reward eating a supplied low calorie meal; then make reward contingent on cooking and eating the meal; then make reward contingent on purchasing, cooking and eating the meal	NA	NA	NA	NA	NA	NA	N
	6	Situation-specific reward	Arrange for reward following the behavior in one situation but not in another (includes ‘Discrimination training’) Note: also code one of 10.2, Material reward (behavior); 10.3, Non-specific reward; 10.4, Social reward, 10.9, Self_x0002_reward; 10.10, Reward (outcome)	Arrange reward for eating at mealtimes but not between meals	NA	NA	NA	NA	NA	NA	N
	7	Reward incompatible behavior	Arrange reward for responding in a manner that is incompatible with a previous response to that situation (includes ‘Counter-conditioning’) Note: also code one of 10.2, Material reward (behavior); 10.3, Non-specific reward; 10.4, Social reward, 10.9, Self_x0002_reward; 10.10, Reward (outcome	Arrange reward for ordering a soft drink at the bar rather than an alcoholic beverage	L	L	L	M	U	L	N
	8	Reward alternative behavior	Arrange reward for performance of an alternative to the unwanted behavior (includes ‘Differential reinforcement’) Note: also code one of 10.2, Material reward (behavior); 10.3, Non-specific reward; 10.4, Social reward, 10.9, Self_x0002_reward; 10.10, Reward (outcome); consider also coding 1.2, Problem solving	Reward for consumption of low fat foods but not consumption of high fat foods	L	L	L	L	U	L	N
	9	Reduce reward frequency	Arrange for rewards to be made contingent on increasing duration or frequency of the behavior (includes ‘Thinning’) Note: also code one of 10.2, Material reward (behavior); 10.3, Non-specific reward; 10.4, Social reward, 10.9, Se	Arrange reward for each day without smoking, then each week, then each month, then every 2 months and so on	L	L	L	L	U	L	N
	10	Remove punishment	Arrange for removal of an unpleasant consequence contingent on performance of the wanted behavior (includes ‘Negative reinforcement’)	Arrange for someone else to do housecleaning only if the person has adhered to the medication regimen for a week	NA	NA	NA	NA	NA	NA	N
15	Self-belief
	1	Verbal persuasion about capability	Tell the person that they can successfully perform the wanted behavior, arguing against self-doubts and asserting that they can and will succeed	Tell the person that they can successfully increase their physical activity, despite their recent heart attack.	L	L	L	NA	L	L	N
	2	Mental rehearsal of successful performance	Advise to practise imagining performing the behavior successfully in relevant contexts	Advise to imagine eating and enjoying a salad in a work canteen	L	L	L	NA	L	L	N
	3	Focus on past success	Advise to think about or list previous successes in performing the behavior (or parts of it)	Advise to describe or list the occasions on which the person had ordered a non-alcoholic drink in a bar	NA	NA	NA	NA	NA	NA	N
	4	Self-talk	Prompt positive self-talk (aloud or silently) before and during the behavior	Prompt the person to tell themselves that a walk will be energising	L	L	L	NA	L	L	N
16	Covert learning
	1	Imaginary punishment	Advise to imagine performing the unwanted behavior in a real-life situation followed by imagining an unpleasant consequence (includes ‘Covert sensitisation’)	Advise to imagine overeating and then vomiting	H	H	H	NA	L	L	Y
	2	Imaginary reward	Advise to imagine performing the wanted behavior in a real-life situation followed by imagining a pleasant consequence (includes ‘Covert conditioning’	Advise the health professional to imagine giving dietary advice followed by the patient losing weight and no longer being diabetic	H	H	H	NA	L	L	Y
	3	Vicarious consequences	Prompt observation of the consequences (including rewards and punishments) for others when they perform the behavior Note: if observation of health consequences, also code 5.1, Information about health consequences; if of emotional consequences, also code 5.6, Information about emotional consequences, if of social, environmental or unspecified consequences, also code 5.3, Information about social…	Draw attention to the positive comments other staff get when they disinfect their hands regularly	L	L	L	NA	L	L	N
