# Supplementary material
Source: Research Square preprint supplement (doi:10.21203/rs.3.rs-8934544/v1)
Supplement: Supplementary file 3 [file 856fe39b3cd3f3bd638799e4.docx]

Additional file 5. Inspection checklist used to inspect butcher shops during our food safety intervention

| **Variable** | **Question** | **Logic** | **Choices** | **Scoring rules** |
| --- | --- | --- | --- | --- |
| ***M0S0notes*** | **CGIAR One Health Initiative (OHI) Strengthening capacity, incentives, and institutions for food safety in Ethiopia (SCIIFS)** |  | [Enumerator Note] |  |
| ***M0S0note*** | **Butcher shop food safety inspection checklist** |  | [Enumerator Note] |  |
| ***M0_Q1*** | **Inspection date** |  | [Calculation] |  |
| ***M0_Q6a*** | **2. Sub city** |  | [10] Addis Ketema SubCity [11] Akaki-Kality SubCity [12] Arada SubCity [13] Bole SubCity [14] Gulele SubCity [15] Kirkos SubCity [16] Kolfe Keraniyo Subcity [17] Lemi Kura SubCity [18] Lideta SubCity [19] Nifas-Silk Lafto SubCity [20] Yeka SubCity |  |
| ***M0_Q6b*** | **3. Woreda** |  | [1] 1 [2] 2 [3] 3 [4] 4 [5] 5 [6] 6 [7] 7 [9] 9 [10] 10 [11] 11 [12] 12 [13] 13 [14] 14 |  |
| ***meatshop_ID*** | **4. Name of the Butcher shop** |  |  |  |
| ***Section Name*** | **Contact/Location Information** |  |  |  |
| ***Telephone_note*** | **Telephone : ${calc_OwnerPhone}** |  | [Enumerator Note] |  |
| ***Location_note*** | **Location - Specific Location : ${calc_Located}** |  | [Enumerator Note] |  |
| ***start_location*** | **Record Your current location** |  | [Lat, Long, Alt] |  |
| ***mapsme_wayfinding*** | **Click to Navigate to the butcher shop using Google Maps** |  | [Text] |  |
| ***OwnerPhone_New*** | **5. Phone number of the butcher shop owner** |  | [Integer] |  |
| ***M0_Q9*** | **6. Name of the main butcher shop operator (butcher):** |  | [Text] |  |
| ***M0_Q10*** | **7. Phone number of the main butcher shop operator (butcher):** |  | [Integer] |  |
| ***M0_Q11*** | **8. Interviewer name** |  |  |  |
| ***MAnotes*** | **Instruction: please select all criteria that apply. Scores will be automatically calculated by the tablet.** |  | [Enumerator Note] |  |
| ***MA_Q1*** | **1. ASK: Have meat handlers in this shop received training on food safety during the past year?** |  | [1] At least one meat handler received any training in food safety in the last one year [2] Certificate shows training was completed within the past year [0] None of the above met | Scoring 2 points if both conditions are met, 1 if one condition is met, 0 if no conditions are met |
| ***MA_Q3*** | **3. ASK: When you get new meat before you finish the old one, how do you manage meat storage and sale?** |  | [1] Newly received meats kept separate from old meats [2] Old meats preferred to be sold prior to starting to sell newly received meats [0] None of the above are mentioned | Scoring 1 point for each of option 1 and 2, 0 if option 3 is selected. |
| ***MA_Q4*** | **4. ASK: What practices should meat sellers follow to ensure the meat they sell is safe?**  *NOTE: do not read responses. Select all that the respondent mentions (either the general principle, or any of the examples).* |  | [1] Use clean cutting surfaces (boards / logs) [2] Disinfect cutting / contact surfaces [3] Use clean tools (knives/grinder/axe) [4] Keep hands clean [5] Store meat and stomach separately [6] Store meat in refrigerator or freezer [7] Sanitize meat using food sanitiser [8] Wear clean white coat [9] Use clean water [10] Use clean towels/cloths  [11] Use different towels/cloths for different purposes  [12] Keep flies off meat  [13] Sell oldest meat first [14] Other, specify [15] None of the above mentioned  [88] Refuse [99] Don’t know | 3 points for 5 or more; 2 if 3 points or more, 1 if 1 selected. |
| ***MA_Q5*** | **5. ASK: When is it important to wash your hands? Tell me all the times it is important to wash hands.**  *(NOTE: do not read responses, select all that worker mentions)* |  | [1] Before commencing/recommencing work [2] At some intervals between raw meat handlings [3] Between handing stomach and raw meat [4] After using a toilet [5] After handling non-food items such as cash, garbage, shaking hands, etc. [6] After sneezing, smoking, eating, touching face [0] None of the above mentioned | Scoring 1 point for each response given up to maximum of 3; 0 if no conditions are met |
| ***MB_Q6*** | **6. OBSERVE: Are all workers in the shop who handle raw meat wearing appropriate personal protective clothing?** |  | [1] White gowns and hairnets are being worn [2] Gowns and hairnets have no visible dirt [3] Gowns have no outside pockets  [0] None of the above met | Scoring 4 points if all 3 conditions are met, 2 if at least condition #1 is met, 0 if no conditions are met |
| ***MB_Q7*** | **7. OBSERVE: Do workers have clean hands?** |  | [1] No visible dirt on hands [2] Trimmed, clean fingernails [3] Not wearing rings or bracelets [4] No bandaged or open wounds [0] None of the above met | 2 points for each condition (1-4) met, 0 if none of these conditions are met (option 0) |
| ***MB_Q8*** | **8. ASK and OBSERVE: I would like to observe when you are washing your hands. Would you please go to handwashing place and wash your hands as you do it usually?** |  | [1] Uses soap [2] Washes between fingers and backs of hands [3] Uses nailbrush [4] Washes for at least 20 seconds [5] Puts hand into water source (if bucket is used) [0] None of the above followed | 5 points if condition #1 (soap) is met, 1 for each of conditions #2, #3, and #4.  Subtract 2 points if condition #5 is met  0 point if [0] is selected |
| ***MB_Q9*** | **9. OBSERVE: Does the butcher shop have a working hand washing facility (with water)?** |  | [1] A working handwashing facility (with water) is present. [0] A working handwashing facility is not present. | 4 points if [1] is selected in MB_Q9 |
| ***MB_Q10*** | **10. OBSERVE: Is soap available at the handwashing facility?** | ${MB_Q9}=1 | [1] Yes, soap is available [0] No soap is available | 3 additional points if [1] selected in MB_Q10 |
| ***MC_11*** | **11. OBSERVE/ASk: Does water used for cleaning surfaces on which food is kept come directly from a pipe, or is it stored?** |  | [1] Water comes directly from a piped connection within the shop [2] Stored in a bucket or jerry can  [0] No water is used | 4 points if condition [1], 2 if condition [2], 0 if condition [0] selected |
| ***MC_11a*** | **Is water treated?** | [relevant if MC_11= 1] | [1] Water is treated (inspector observes treatment tablet or solution)  [2] Water is not treated (inspector does not observe treatment tablet or solution) | 1 point if condition [1], 0 if condition [2] |
| ***MC_12*** | **12. OBSERVE: Whether meat that is hung is fresh, clean, bright in colour** |  | [1] All meat that is hung is fresh, clean, and bright in colour [2] No meat is hung  [3] Meat is hung but looks old | 2 points if ALL the meat displayed is fresh, clean, and bright in colour OR if no meat is displayed, 0 if meat is hung but looks old |
| ***MC_13*** | **13. OBSERVE: Does the butcher shop have a CLEAN AND SMOOTH chopping log?** |  | [1] The chopping log is clean **AND** smooth [2] The chopping log is clean but not rough or cracked [3] The chopping log has smooth top surface but is dirty [0] The chopping log is visibly dirty and rough or cracked | 3 points if condition [1] is selected  1 point if [2] but not [3] is selected  1 point if [3] but not [2] is selected  0 if condition [0] is selected |
| ***MC_14*** | **14. OBSERVE: Does the butcher shop have an appropriate and clean meat cutting board?** |  | [1] Washable (plastic, marble, or smooth wood) and no grooves [2] No visible dirt or dried blood [0] None of the above met | 1 point each for washable and clean (maximum of 2), 0 if no condition met |
| ***MC_15*** | **15. OBSERVE: Stomach kept separate from the meat. If no stomach currently in stock, ASK workers where these are stored.** |  | [1] Stomach kept separate from the meat [2] The shop does not sell stomach [0] Above conditions are not met | 5 points if either [1] or [2]. |
| ***MC_16*** | **16. OBSERVE: Actual transaction: Whether different persons handle cash and meat or person handling both washes hands between cash and meat handlings** |  | [1] Different persons handle cash and meat [2] Same person handles meat and cash and washes hands between cash and meat handlings [0] None of the above are met | 7 points if either [1] or [2] |
| ***MC_17*** | **17. OBSERVE: if not ASK: Whether different meat cutting boards for meat and stomach** |  | [1] Different cutting boards are used for cutting meat or separate section of a large cutting board (at least 1m) is used for cutting meat and stomach  [2] Shop does not sell stomach [0] None of the above are met | 7 points if [1] or [2]; 0 points if [0] |
| ***MC_18*** | **18. OBSERVE and Ask: Whether adequate food sanitizer is observed and in use** |  | [5] Appropriate food sanitizer (citric acid or ZOE Safe) is observed and in use (worker is able to quickly locate sanitizer) [0] Not in use | 5 points if food sanitizer is in use and worker is able to quickly locate. |
| ***MD_19*** | **19.OBSERVE/CHECK: Whether a functional refrigerator present** |  | [2] Functional refrigerator is present in the butcher shop [0] No functional refrigerator is present | 2 points if fridge present |
| ***MD_20*** | **20. OBSERVE/CHECK: Whether a working, accurate fridge/freezer thermometer present** |  | [1] A working and accurate fridge or freezer thermometer is present (could be integrated in fridge/freezer or a separate unit) [0] No working fridge thermometer is present | 1 point if thermometer present |
| ***MD_21*** | **21. OBSERVE/CHECK: Whether storage temperature is appropriate** |  | [2] All meat (aside from tere siga/kurt) is stored at an appropriate temperature (0°C to 4°C, or below -5°C if frozen) [1] Some meat (aside from tere siga/kurt) is stored at an appropriate temperature (0°C to 4°C, or below -5°C if frozen) but some is not  [0] No meat is stored at an appropriate temperature | 2 points if all meat stored at appropriate temperature, 1 point if some stored at appropriate temp |
| ***MF_22*** | **22.OBSERVE: Whether meat holding board surface on which the meat rests is smooth, washable, and clean** |  | [1] The meat holding/hanger board is smooth and washable (metal, heavy plastic, stone, or heavily painted wood) [2] The meat holding/hanger board is clean [0] None of the above conditions are met | 1 point each for meat hanger/board (a) smoth and (b) clean |
| ***MF_23*** | **23. OBSERVE: Whether the butcher shop wall is appropriate (made of standard building material like cement, concrete, ceramic or other), washable, clean** |  | [1] The butcher shop wall is made using appropriate building material (cement, concrete, ceramic tile, etc.) [2] The butcher shop wall is washable (smooth, not mud no obvious cracks, holes, or damage)  [3] The butcher shop wall is clean [0] None of the above conditions are met | 1 point if ANY [1] [2] or [3] selected, 2 points if ALL of [1] [2] and [3] selected |
| ***MF_24*** | **24. OBSERVE: Whether the butcher shop floor is appropriate (made of standard building material like cement, concrete, ceramic or other), washable, clean** |  | [1]     The butcher shop floor is made using appropriate building material (cement, concrete, ceramic tile, etc.) [2]     The butcher shop floor is washable (smooth, not mud, no obvious cracks, holes, or damage) [3]     The butcher shop floor is clean [0] None of the above conditions are met | 0.5 point if ANY [1] [2] [3] selected, 1 point if ALL of [1] [2] and [3] selected |
| ***MG_25*** | **25. OBSERVE & ASK: Whether the butcher shop is free of flies, cockroaches, and other insects** |  | [1] Fewer than five flies and no other pests (birds, rodents, cockroaches, or other insects) are observed in or around the butcher shop [2] Workers confirm absence of pest infestation (birds, rodents, cockroaches, other insects) in the butcher shop [0] Neither of the above conditions are met | 3 points if [1] and [2] selected; 0 points otherwise |
| ***MG_26*** | **26.OBSERVE: Whether the butcher shop has a functional fly control system in place** |  | [2] The butcher shop has a fly control system (traps, smoking repellent, chira, swatters, strong cross breeze, etc.) [0] No fly control system is present | 2 points if fly control system in place |
| ***MH_27*** | **27. OBSERVE: Whether the butcher shop has adequate storage facilities for garbage or waste** |  | [1]     The butcher shop has an impermeable, dust bin with lid for garbage/waste [2]     The dust bin is pedal-operated [3]     Liquid waste disposal is connected with sewerage system [4]     There is no garbage on the floor or surfaces [0] None of the above conditions are met | 3 points for condition #1, 1 for condition #2, 1 for condition #3.  0 if condition # 4 is not met. |
| ***MI_28*** | **28. OBSERVE: Can the vendor show a stamp or receipt indicating the meat for sale was purchased from a registered abattoir?** |  | [3] Yes, a stamp or receipt for today’s meat is observed [0] No, a stamp or receipt for today’s meat cannot be observed | 3 points if stamp can be seen, 0 if not |
| ***Total_Score_Green_note*** | **Inspection results (total points in %):__ Congratulations, you passed this inspection and earned a [GREEN] rating. Here is your rating sign.** | Total score:  ≥75 | [Enumerator Note] |  |
| ***Total_Score_Yellow_note*** | **Inspection results (total points in %):__ Congratulations, you passed this inspection and earned a [YELLOW] rating. Here is your rating sign. You can always improve your rating the next time we visit. If you wish to have a priority rating, please call the number on the information sheet** | Total score:  65≤ score <75 | [Enumerator Note] |  |
| ***Total_Score_red_note*** | **Inspection results (total points in %):__ Congratulations, you passed this inspection and earned a [RED] rating. Here is your rating sign. You can always improve your rating the next time we visit. If you wish to have a priority rating, please call the number on the information sheet** | Total score:  50≤ score <65 | [Enumerator Note] |  |
| ***Total_Score_failed_note*** | **Inspection results (total points in %):__**  **Sorry, you failed inspection this time, so I am not giving you a rating sign. You can always improve your rating the next time we visit.  If you wish to have a priority rating, please call the number on the information sheet.** | Total score:  < 50 | [Enumerator Note] |  |
| ***MB1_QB4*** | **B4. Who participated in the inspection process?** |  | [1] Meat cutter [2] Butcher shop owner [3] Restaurant manager [4] Butcher shop butcher [5] Other butcher shop workers (specify) |  |
| ***MB1_QB4oth*** | **B4.Oth. Who participated in the inspection process? Other Specify** | selected(${MB1_QB4}, '5') | [Text] |  |
| ***MB1_QB6*** | **B5. Inspector’s general comment** |  | [Text] |  |
| ***Consent_end*** | **1. Day/month/year** |  | [Calculation] |  |
| ***MB1_thanks*** | **Thank you for your time, we are finished with the interview.** |  | [Enumerator Note] |  |
