# Supplementary material
Source: Research Square preprint supplement (doi:10.21203/rs.3.rs-8934544/v1)
Supplement: Supplementary file 4 [file 92795ed16a615a565f24aba0.docx]

Additional file 4. List of hygiene materials provided to the butcher shops

| **Item** | **Quantity**  **per shop** | **Guide on use of the hygiene materials** |
| --- | --- | --- |
| Hand sanitizer (2 bottles) | 2 | It is good to sanitize your hands using sanitizer after washing or in between work. This helps to kill germs which are not visible to our eyes. |
| Liquid soaps (Laundry detergent) (1 bottle) | 1 | Soaps are important for effective cleaning of all materials. We will provide you with a bottle ‘largo’ which can be used to wash gowns, hairnets, towels. You may have already such kind of soaps and continue purchasing for your meat shop hygiene. |
| Cutting board (3 pieces) | 3 | We highly recommend using a separate cutting board for stomach and red meat. We are giving these relatively small cutting boards, which may be used only for stomach/offal only. |
| Microfiber wiping towels (grey, lemon, blue) (4 pieces from each colour) | 12 | We will give you wiping towels of three different colours (grey, lemon, blue). We recommend cleaning cloth to be different colour for different levels of dirtiness. We are giving you now towels of three different colours and recommend using as I am going to tell you now. Grey to clean dirty surfaces such as removing food residues and debris. After this, the surface will be cleaned with soapy water. Then, lemon towel will be used to wipe the surface. Finally, the surface will be disinfected and dried with the blue towel soaked with disinfectant. |
| Buckets (Red, pink, green) (1 piece from each) | 3 | We will provide you cleaning buckets of three different colours (red, pink, green). Like the towels, we also recommend using buckets of different colours for soaking the towels during cleaning. Red bucket will be used with grey towel (water with no soap); pink with lemon towel (contain soapy water) and green bucket is used with blue towel (towels to be sprayed when sanitizing food contact surface). These different colour buckets serve as reminder for our mind to differentiate levels of cleanliness during cleaning and busy time. |
| Brush (2 pieces) | 2 | Brushes will be used to scrub surfaces during cleaning. The brushes given to you here can be especially used for cleaning chopping logs. |
| Dishwash liquid soaps (1 bottle) | 1 | Food contact surfaces (knives, knife files, axes) need special soap (dishwash) specifically prepared. Do not use laundry shop for cleaning meat contact utensils. This soap is provided for you as an example. |
| Aquatab tablets for water purification (strips containing 10 tablets) | 24 | It is highly recommended to use tap water in meat vendor shop for practices involving contact with meat. If tap water is not available, it is recommended to purify using water purification techniques such as using chlorine tablets. We are giving you aquatab tablet for water disinfection. One tablet is enough for 20L. For more information, see the pamphlet provided to you how to use chlorine tablets to disinfect water. |
| Hypochlorous acid (trade name: Zoe safe) for sanitizing worksurfaces (2 bottles) | 2 | Various substances which are safe for human health can be used for sanitizing meat contact surfaces. This material is used to disinfect surfaces after cleaning with soapy water. For more information, read the pamphlet provided to you describing how to use Zoe safe for cleaning work surfaces. |
| Hypochlorous acid (trade name: Zoe safe) for sanitizing/decontamination of meat (2 bottles) | 2 | Various substance which are safe for human health can be directly sprayed on meat to decontaminate meat surfaces. This should be emphasized as it reduces bacterial load that comes outside of the meat shops such as abattoir contamination. For more information, read the pamphlet provided to you describing how to use Zoe safe for decontaminating meat surfaces. |
| Foot operated dust bin with tight lid (1 piece) | 1 | We highly recommend using separate containers for liquid and solid waste materials. This dustbin is used to store solid waste materials. It is highly recommended to use a foot operated dustbin. This helps to reduce hand contamination when opening. |
| Fingernail clippers (1 pack) | 1 | It is always good to make nails short. Dirty materials can be specifically deposited under fingernails and those dirty things are not easy to remove when washing hands. Having clip nails and keeping them at an accessible place encourages frequent nail clipping. This pack of nail clippers is a gift, and you may share among people who work closely with meat (e.g., meat cutters) |
| Oxfam washing station (1 piece), only those instructed | 11 | Used for handwash. Install according to the manual (with help of people accompanying you). This washing station was given to shops with poor handwashing station. |
