# Supplementary material
Source: Research Square preprint supplement (doi:10.21203/rs.3.rs-8934544/v1)
Supplement: Supplementary file 5 [file afcff567df4e2118e525b797.docx]

Additional file 1. Acceptability, practicability, effectiveness, affordability, side-effects and equity criteria (APEASE criteria) to select the BCTs.

| **Criterion** | **Description** | **Additional notes** |
| --- | --- | --- |
| **Acceptability** | •How far can the intervention be judged appropriate by the key stakeholders including shop managers, meat handlers, food regulators, consumers, research team delivering the intervention and any relevant community and commercial groups? |  |
| **Practicability** | • How far can the intervention be implemented at scale within the intended context of butcher shops, project period, available human, financial and logistic resources? |  |
| **Effectiveness** | - How effective can the intervention be in enhancing meat handlers’ food safety knowledge and behaviours and leading to reduced microbial contamination in shops or influencing the entire food safety ecosystem of butcher shops? How far will it reach the intended target butcher shops and how large an effect will it have on those shops which are reached? |  |
| **Affordability** | • How far can the intervention be afforded when delivered at the scale intended within the project budget capacity? |  |
| **Side-effects** | • How far can intervention lead to unintended adverse outcomes? |  |
| **Equity** | • How far will the intervention increase or decrease differences between shops compared to the normal situation before the intervention? |  |
