# Supplementary material
Source: Research Square preprint supplement (doi:10.21203/rs.3.rs-8934544/v1)
Supplement: Supplementary file 6 [file ecefcb20914e52ed6ffa1770.docx]

Additional file 3. TIDieR used for reporting mode of delivery of our food safety intervention

**
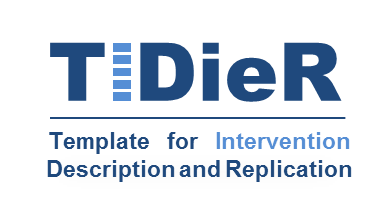
The TIDieR (Template for Intervention Description and Replication) Checklist*:**

Information to include when describing an intervention and the location of the information

| **Item number** | **Item** | **Where located **** | |
| --- | --- | --- | --- |
|  | Primary paper  (Page number) | Other † (details) |
|  | **BRIEF NAME** |  |  |
| **1.** | Provide the name or a phrase that describes the intervention.   - Development of a theory-informed multicomponent food safety intervention to enhance food safety knowledge and behaviours of meat handlers and reduce microbial contamination in butcher shops in Addis Ababa, Ethiopia | **1** | ______________ |
|  | **WHY** |  |  |
| **2.** | Foodborne diseases cause substantial public health and socioeconomic burdens worldwide 1. Food businesses are expected to comply with the Codex Alimentarius Commission (CAC) General Principles of Food Hygiene 2 to ensure the safety of the food they produce. However, their adherence to good hygiene practices (GHPs) largely depends on their food safety culture such as food handlers’ behaviour towards food safety, which is influenced by multiple environmental 3–7 and individual 3,4,6,7 factors. Thus, BCIs that target multiple food safety determinants are key to enhancing food businesses’ adherence to proper food safety practices. While an intervention is a planned process that has the aim of influencing an outcome, BCI is an intervention that has the aim of influencing human behaviour8. Although BCIs are recommended to be grounded in behaviour change theories 9,10, food safety BCIs are rarely guided by theoretical frameworks 11,12. When theory is used, it is often limited to a single theory 11–13, which captures only a subset of the determinants influencing food safety behaviour, excluding potentially important food safety determinants from considering in interventions. In addition, use of single theories often focuses on identifying determinants of food safety practices 11,12,14 and overlook use of theories to guide intervention design such as selecting target behaviours and intervention options.  To address challenges related to using theories in BCIs designing, researchers working in BCIs have developed comprehensive theoretical frameworks 9,10,15 which allow systematic integration of multiple behavioural determinants into BCI processes. The BCW, for example, allows intervention designers integrating food safety determinants associated with capability, opportunity, and motivation (the COM-B model) and selecting potential intervention options and policy categories 9 while designing BCIs and the TDF enables incorporating 14 domains and 84 behavioural change constructs to the design process (Cane, O’Connor and Michie, 2012). Besides, the behaviour change taxonomy 15 provides 93 distinct BCTs which can be used in BCIs across various disciplines. BCT is a planned process that is the smallest part of BCI content that is observable, replicable and on its own has the potential to bring about behaviour change 8. Providing detailed descriptions of BCTs used in BCIs allows research replication, evidence synthesis, effective BCIs development and understanding of mechanisms of actions of BCIs 15,16. Furthermore, linking components of the BCW, COM-B, TDF, and BCT frameworks facilitates a more explicit understanding of the mechanisms of action of BCIs. Although these frameworks and BCTs are widely applied in public health–related BCIs 17–19, their use is rare in food safety BCIs 14,14.  In addition to being grounded in theory during their designing, various aspects of BCIs such as their mode of delivery, materials used, deliverers and so on should be described adequately using appropriate guidelines and models. However, various studies have shown deficiencies in the description of BCIs while reporting 20–25. For example, Hoffmann *et al* 21 found in their review of 137 interventions that only 39% were adequately described. Inadequate descriptions of BCIs hinders critical appraisal, reduces replicability, limits evidence synthesis, and impedes the translation of findings into practice 26–28.Various guidelines have been developed to facilitate description of behaviour change interventions 27–29. | **3-4** | _____________ |
|  | **WHAT** |  |  |
| **3.** | Materials: Describe any physical or informational materials used in the intervention, including those provided to participants or used in intervention delivery or in training of intervention providers. Provide information on where the materials can be accessed (e.g. online appendix, URL).  A total of 302 butcher shops were signed up to the study. One meat handler was selected from each shop to participate in the study. Eligible participants were adults 18 years of age or older and had primary responsibilities for regular meat handling (e.g., receiving, sorting, cleaning, hanging/storing, cutting [preparing for sale], and selling meat). The 302 butcher shops were randomly assigned to one of two intervention groups (Intervention 1 and Intervention 2) (101 shops each) or a control group (100 shops). Intervention 1 shops (hereinafter called TNM) received training, nudges and hygiene materials while shops in Intervention 2 (hereinafter called TNMI), in addition to the interventions received by TNM shops, were inspected and rated, and the ratings publicly posted (‘scores on doors’). Controls received nothing during intervention but received training, nudges and hygiene materials after endline data collection. Details of these intervention packages will be provided below under procedures at item 4. | **5** | _____________ |
| **4.** | Procedures: Describe each of the procedures, activities, and/or processes used in the intervention, including any enabling or support activities.  **Training:**  The training material has four modules, each targeting specific learning objectives and arranged progressively from fundamental to relatively more difficult concepts. Training contents were tailored to address GHPs in butcher shops. Module one was an introduction to food safety training. Module two focused on food safety concepts, foodborne hazards and their control measures, impacts of unsafe food, how to keep food safe and benefits of maintaining workplace hygiene. Module three covered basic GHPs 2 that food businesses are expected to follow including hands hygiene, wearing appropriate and clean protective clothing, worker health, cleaning and disinfection of worksite surfaces and tools, use of safe water, safe meat storage, pest control, waste management and ensuring proper internal structures and facilities of butcher shops . Module four was on creating and maintaining a positive food safety culture in food businesses. The modules were prepared in English and translated into Amharic (the local language) and delivered in Amharic.  The training was delivered in multiple sessions (three sessions): First, butcher shop workers attended a four-hour training (in two sessions, with 20 minutes rest between the sessions) at a hotel near their workplaces (offsite training) conducted by ILRI research team. Data collectors invited the shops to the training during baseline data collection by delivering a letter of invitation stating the date of training and that the meat handler should attend. We organized eight training sessions to educate 202 meat handlers (required four days to complete the training aiming to train 50 workers per day, 25 workers by each trainer) who participated from intervention shops. This offsite training was provided by two research team members from ILRI who involved in the design of the overall project and the training materials. The training at the hotels was delivered as multimedia instruction (presenting words and pictures using PowerPoint presentation), practical demonstration (trainers showed the learners how to perform a skill or task through a step-by-step live demonstration followed by hands-on practice by learners) and active discussion. Participants received pre-and post-test during offsite training. Participants also received certificates that show successful completion of the training. Of the invited meat handlers to the offsite training from intervention shops (excluding control shops), 91% (183/202) of them attended the training: 94% (94/101) for TNM and 88% (89/101) for TNMI shops.  Next, one week later, they received on-the-job training at their shops (2-hour training at each shop) to reach meat handlers who did not attend the training at the hotels and reinforce knowledge for those who did, 95% (192/202) of the shops trained: 96% (97/101) for TNM and 94% (95/101) for TNMI shops. This was because shops often have two or more workers, but it would be difficult to send all workers to offsite training on the same day, so some missed the hotel training. The contents of on-the-job training were the same as offsite training but shortened to fit the limited time available to butcher shop workers, given the busy nature of their work. The training modules were summarized in a booklet 53 to be used by the trainers at this on-the-job training and this booklet was also provided to the butcher shops to refer to it while at their work. In addition, two months after the on-the-job training, refresher training (2-hour training at each shop) was conducted by on-the-job training at the butcher shops. Food business inspectors from AA-FDA who were trained on the training materials (by the two research team members who provided the offsite training) provided both on-the-job training and the refresher training. Eleven food inspectors (one from each sub-city of Addis Ababa) provided the training in their own sub-city (where they routinely work).  **Environmental Nudges:**  Food inspectors also posted the nudges at both TNM and TNMI shops during the on-the-job training. The nudge kit included posters, practical instructions for implementing food safety practices, and a booklet summarizing the training modules, all provided in the local language (Amharic). The posters were displayed in shops to act as guides and reminders and to promote hygienic behaviors.   - First poster “clean shop, clean butcher, happy customer” advised butcher shops to adhere to the ‘5 cleans’ (clean hands, clean clothes and cloths, clean water, clean surfaces, clean tools) and ‘3 S’ (separate, sanitize, safe storage) proper food safety behaviours to protect themselves and their customers from harmful bacteria that can cause foodborne illness. This was posted where meat handlers can always see while at their work. - Second poster “clean hands, happy customer” illustrated steps of proper handwashing. This was posted at handwashing basin of the shops to remind meat handlers the proper handwashing steps. - The third poster attempted to harness consumer demand for clean safe food. It gave tips to customers how to evaluate butcher shops hygiene status including: cleanliness of meat handler hands, work surfaces and tools, worksite clothes such as gowns and hairnets and inspection rating of shops. This was posted at places where customers can easily see while purchasing meat from shops. - The fourth poster was a commitment device, a type of nudge and also a moral incentive, which showed food safety behaviours that meat handlers pledged to adhere to by signing on the poster. - The fifth poster was an inspection scorecard which displayed shops inspection ratings. Posted hygiene ratings, based on inspection are used in many high-income countries to inform consumers and give incentives to business operators to improve hygiene. These scorecards communicate shop hygiene level to the customers quickly and intuitively.   These posters have been submitted along with the manuscript as figures.  **Hygiene material provision:**  During on-the-job training, food inspectors also provided both TNM and TNMI shops the same list of hygiene materials (hygiene kits). These materials aimed to facilitate the targeted food safety behaviours of meat handlers, and the lists were aligned with contents of training modules (especially the GHPs). For example, we provided hand sanitisers, chlorine tablets, laundry soaps, etc (Supplementary Table S4). Some materials, such as chlorine tablets, dust bins, and cleaning buckets, were supplied in sufficient quantities to last throughout the intervention. However, the primary focus of the intervention was to motivate butcher shops to adopt, sustain, and self-supply hygiene materials beyond the intervention period.  **Inspection with ‘scores on doors’:**  We used butcher shops inspection with disclosure of their inspection ratings (inspection with ‘scores on doors’) as one of the elements of our intervention package. The inspection was done using inspection checklist which was prepared based on AA-FDA butcher shops inspection checklist and existing literature on the general principles of food hygiene requirements in food businesses 2,54,55. Items in inspection checklist also aligned with contents of training modules. The inspection checklist covered hands hygiene, wearing appropriate and clean protective clothing, worker health, cleaning and disinfection of worksite surfaces and tools, use of safe water, , safe meat storage, pest control, waste management and ensuring proper internal structures and facilities of butcher shops. This inspection checklist has 28 items (Supplementary inspection checklist S5), with each item having detailed weighted conditions to rate hygiene compliance of the shops. Food inspectors, from Addis Ababa Food and Drug Authority, who trained on the inspection checklist inspected the butcher shops.  During on-the-job training, the TNMI butcher shops received self-inspection checklists to help them prepare, though the timing of the inspection was not disclosed. Two rounds of inspections were carried out: one week and two months after on-the-job training with each inspection lasting approximately one hour per shop. The checklist was digitized using the SurveyCTO App, which automatically calculated scores based on inspectors’ selections of item conditions. Ratings were assigned as follows:  No star (score <50): warning of closure.  One red star (50≤ score <65): urgent hygiene improvement is required.  Two yellow stars (65≤ score <75): hygiene standards are good.  Three green stars (≥75): hygiene standards are very good.  **Innovative technologies:**  We also used innovative technologies to enhance our intervention effectiveness. A key intervention was slightly acidic electrolysed water (hypochlorous acid) as meat decontaminant and disinfectant of work surfaces. Other innovations included nudges: for example, color-coded cleaning buckets with red for initial cleaning, pink for intermediate, and green for final cleaning to promote step-by-step cleaning based on the dirtiness of the work surfaces, which followed the widely recognised “traffic lights” sequence where red is danger and green is safe. We also trained meat handlers how to conduct deep cleaning. This is a periodic thorough cleaning process that goes beyond routine or surface-level cleaning as it involved removing dirt, grease, and residues from hard-to-reach areas in routine cleaning such as from ceilings, grooves, etc. Deep cleaning was not a concept or practice previously used in Ethiopia. | **16-22** | _____________ |
|  | **5. WHO PROVIDED** |  |  |
|  | For each category of intervention provider (e.g. psychologist, nursing assistant), describe their expertise, background and any specific training given.  Offsite training (training at hotels) was provided by research team who designed the training modules. Onsite (on-the-job training) training was delivered by Addis Ababa Food and Drug authority food inspectors who trained on the training modules. These inspectors also distributed the hygiene materials and posted the nudges (posters) at the shops during the onsite training. They also inspected shops in the TNMI groups. | **16-17, 21** | _____________ |
|  | **HOW** |  |  |

| **6.** | Describe the modes of delivery (e.g. face-to-face or by some other mechanism, such as internet or telephone) of the intervention and whether it was provided individually or in a group.t  Offsite training was provided in a hotel room in a group of about 25 participants using PowerPoint presentation, discussion, live demonstration, and hands-on demonstration. On-the-job training was provided at the shops involving all staff working at the given shop. Trainers used a booklet (summary of the training modules) to train meat handlers at shops. They also explained the use of each of the hygiene materials during this training. Posters were also explained and posted at the shops. | **16-17** | _____________ |
| --- | --- | --- | --- |
|  | **WHERE** |  |  |
| **7.** | Describe the type(s) of location(s) where the intervention occurred, including any necessary infrastructure or relevant features.  As indicated above, offsite training was delivered at hotels near to the shops; on-the-job training was conducted at the shops; nudges (posters) were posted at the shops; materials were provided onsite during the on-the-job training. | **16-17** | _____________ |
|  | **WHEN and HOW MUCH** |  |  |
| **8.** | Describe the number of times the intervention was delivered and over what period of time including the number of sessions, their schedule, and their duration, intensity or dose.  As mentioned above, training was delivered three times: offsite, on-the-job and refresher training. Hygiene materials provided once. Inspection and rating were done twice: one week and two months after on-the-job training with each inspection lasting approximately one hour per shop. | **16-17, 21** | _____________ |
|  | **TAILORING** |  |  |
| **9.** | If the intervention was planned to be personalised, titrated or adapted, then describe what, why, when, and how.  NA | **N/A** | _____________ |
|  | **MODIFICATIONS** |  |  |
| **10.ǂ** | If the intervention was modified during the course of the study, describe the changes (what, why, when, and how).  NA | **N/A** | _____________ |
|  | **HOW WELL** |  |  |
| **11.** | Planned: If intervention adherence or fidelity was assessed, describe how and by whom, and if any strategies were used to maintain or improve fidelity, describe them. | **N/A** | _____________ |
| **12.ǂ** | Actual: If intervention adherence or fidelity was assessed, describe the extent to which the intervention was delivered as planned.  Of the invited meat handlers to the offsite training from intervention shops (excluding control shops), 91% (183/202) of them attended the training: 94% (94/101) for TNM and 88% (89/101) for TNMI shops. About 95% (192/202) of the shops trained during on-the-job training: 96% (97/101) for TNM and 94% (95/101) for TNMI shops. | **16** | _____________ |

** **Authors** - use N/A if an item is not applicable for the intervention being described. **Reviewers** – use ‘?’ if information about the element is not reported/not sufficiently reported.

† If the information is not provided in the primary paper, give details of where this information is available. This may include locations such as a published protocol or other published papers (provide citation details) or a website (provide the URL).

ǂ If completing the TIDieR checklist for a protocol, these items are not relevant to the protocol and cannot be described until the study is complete.

* We strongly recommend using this checklist in conjunction with the TIDieR guide (see *BMJ* 2014;348:g1687) which contains an explanation and elaboration for each item.

* The focus of TIDieR is on reporting details of the intervention elements (and where relevant, comparison elements) of a study. Other elements and methodological features of studies are covered by other reporting statements and checklists and have not been duplicated as part of the TIDieR checklist. When a **randomised trial** is being reported, the TIDieR checklist should be used in conjunction with the CONSORT statement (see [www.consort-statement.org](http://www.consort-statement.org)) as an extension of **Item 5 of the CONSORT 2010 Statement.** When a **clinical trial** **protocol** is being reported, the TIDieR checklist should be used in conjunction with the SPIRIT statement as an extension of **Item 11 of the SPIRIT 2013 Statement** (see [www.spirit-statement.org](http://www.spirit-statement.org)). For alternate study designs, TIDieR can be used in conjunction with the appropriate checklist for that study design (see [www.equator-network.org](http://www.equator-network.org)).

References:

Amenu, K, G Dined, A Mekonnen, et al. 2024. “Guide for Hygienic and Safe Handling of Meat in Butcher Houses in Addis Ababa:Strengthening Capacity, Incentives and Institutions for Food Safety in Ethiopia.” https://cgspace.cgiar.org/server/api/core/bitstreams/96a9200c-a094-453e-8776-8a56473c943c/content.

Amenu, K, G Dinede, A Keba, et al. 2024. *Stakeholder Workshop on the Dissemination of Findings of Interventions to Improve Food Safety in Red Meat Vendor Shops in Addis Ababa, Ethiopia*.

Arendt, Susan W., Paola Paez, and Catherine Strohbehn. 2013. “Food Safety Practices and Managers’ Perceptions: A Qualitative Study in Hospitality.” *International Journal of Contemporary Hospitality Management* 25 (1): 124–39. https://doi.org/10.1108/09596111311290255.

Cane, James, Denise O’Connor, and Susan Michie. 2012. “Validation of the Theoretical Domains Framework for Use in Behaviour Change and Implementation Research.” *Implementation Science* 7 (1): 37. https://doi.org/10.1186/1748-5908-7-37.

FAO and WHO. 2023. *General Principles of Food Hygiene*. FAO; WHO; https://doi.org/10.4060/cc6125en.

Foy, Robbie, Jillian J Francis, Marie Johnston, et al. 2007. “The Development of a Theory-Based Intervention to Promote Appropriate Disclosure of a Diagnosis of Dementia.” *BMC Health Services Research* 7 (1): 207. https://doi.org/10.1186/1472-6963-7-207.

French, Simon D, Sally E Green, Denise A O’Connor, et al. 2012. “Developing Theory-Informed Behaviour Change Interventions to Implement Evidence into Practice: A Systematic Approach Using the Theoretical Domains Framework.” *Implementation Science* 7 (1): 38. https://doi.org/10.1186/1748-5908-7-38.

Green, Laura R, and Carol Selman. 2005. “Workers ’ and Managers ’ Safe Food Preparation Practices : A Qualitative Study INTRODUCTION.” *Food Protection Trends* 25 (12): 981–90.

Havelaar, Arie H., Kirk, Martyn D., Tprgerson, Paul R., Gibb, Herman J., Hald Tine.,Lake, Robin J., Praet,Nicolas, Bellinger, Dvid C., De Silva Nilanthi R., Gargouri, Neyla. 2015. “World Health Organization Global Estimates and Regional Comparisons of the Burden of Foodborne Disease in 2010.” *PLoS Medicine* 12 (12): e1001923.

Howells, Amber D., Kevin R. Roberts, Carol W. Shanklin, Valerie K. Pilling, Laura A. Brannon, and Betsy B. Barrett. 2008. “Restaurant Employees’ Perceptions of Barriers to Three Food Safety Practices.” *Journal of the American Dietetic Association* 108 (8): 1345–49. https://doi.org/10.1016/j.jada.2008.05.010.

Michie, Susan, Michelle Richardson, Marie Johnston, et al. 2013. “The Behavior Change Technique Taxonomy (v1) of 93 Hierarchically Clustered Techniques: Building an International Consensus for the Reporting of Behavior Change Interventions.” *Annals of Behavioral Medicine* 46 (1): 81–95. https://doi.org/10.1007/s12160-013-9486-6.

Michie, Susan, Maartje M Van Stralen, and Robert West. 2011. “The Behaviour Change Wheel: A New Method for Characterising and Designing Behaviour Change Interventions.” *Implementation Science* 6 (1): 42. https://doi.org/10.1186/1748-5908-6-42.

Mosimann, Sabrina, Keorimy Ouk, Nora M. Bello, et al. 2023. “Describing Capability, Opportunity, and Motivation for Food Safety Practices among Actors in the Cambodian Informal Vegetable Market.” *Frontiers in Sustainable Food Systems* 7 (March): 1060876. https://doi.org/10.3389/fsufs.2023.1060876.

Nik Rosmawati Nik Husain, Wan Manan Wan Muda, and Noor Izani Noor Jamil. 2016. “Effect of Food Safety Training on Food Handlers’ Knowledge and Practices A Randomized Controlled Trial.” *The Eletronic Library* 7 (411): 397–412.

Schenk, Paulina M, Alison J Wright, Robert West, et al. 2024. “An Ontology of Mechanisms of Action in Behaviour Change Interventions [Version 2; Peer Review: 3 Approved].” *Wellcome Open Research*.

Wang, Li, David Demeritt, and Henry Rothstein. 2023. “Regulating through Disclosure: The Case of Food Hygiene Barometer Ratings in China.” *Journal of Risk Research* 26 (4): 393–414. https://doi.org/10.1080/13669877.2023.2170451.

York, Valerie K, Laura A Brannon, Carol W Shanklin, Kevin R Roberts, Betsy B Barrett, and Amber D Howells. 2009. “Intervention Improves Restaurant Employees’ Food Safety Compliance Rates.” *International Journal of Contemporary Hospitality Management* 21 (4): 459–78. https://doi.org/10.1108/09596110910955703.

Young, Ian, Judy Greig, Barbara J. Wilhelm, and Lisa A. Waddell. 2019. “Effectiveness of Food Handler Training and Education Interventions: A Systematic Review and Meta-Analysis.” *Journal of Food Protection* 82 (10): 1714–28. https://doi.org/10.4315/0362-028X.JFP-19-108.
